# Supplementary material
Source: PubMed Central journal article supplement (PMC5268168)

A

WT

*Crb2*<sup>-/-</sup>

Laminin  
E-cadherin  
DAPI

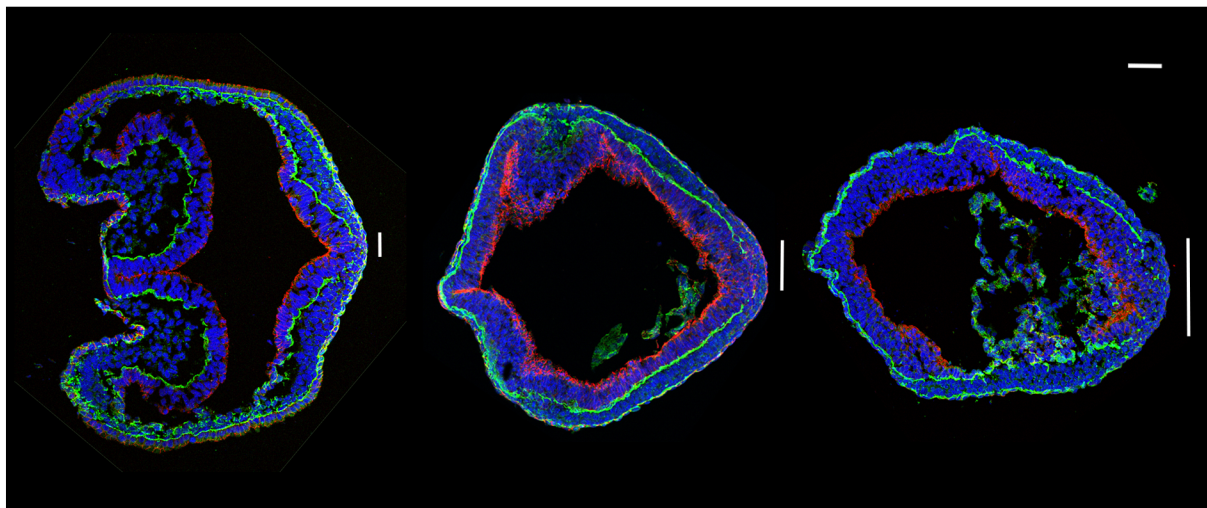

WT

*Sox2*CRE *Rac1*<sup>fllox/Δ</sup>

B

Snail1  
Phalloidin  
Laminin  
DAPI

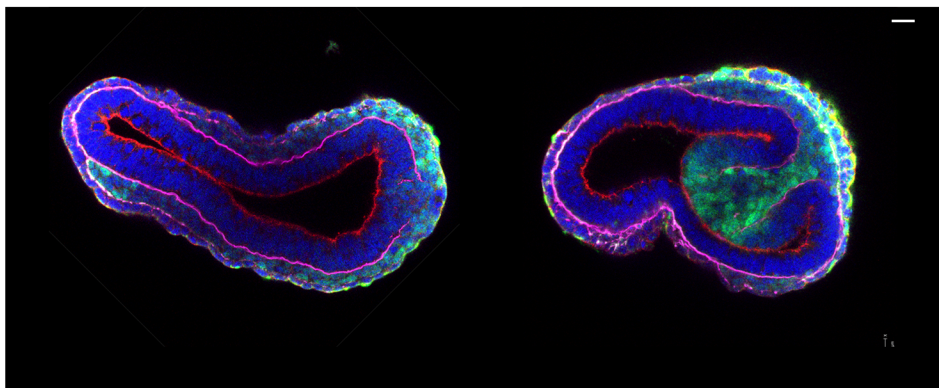

Supplement: NIHMS842486-supplement-S2.pdf [file NIHMS842486-supplement-S2.pdf]
