# Supplementary material
Source: PubMed Central journal article supplement (PMC5268168)

E7.5- bud

E7.5- bud

E7.75 head fold stage

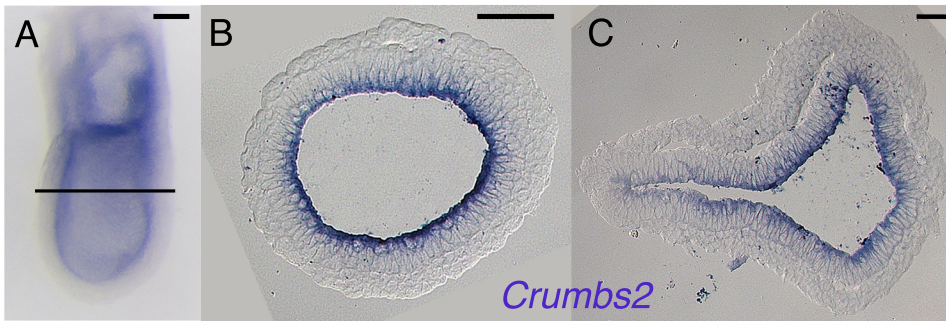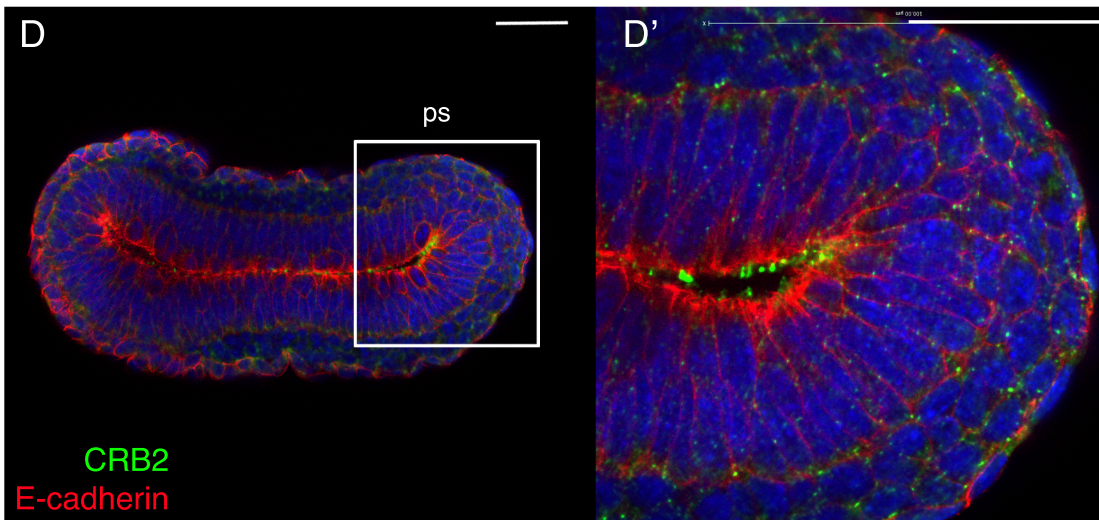

Supplement: NIHMS842486-supplement-S1.pdf [file NIHMS842486-supplement-S1.pdf]

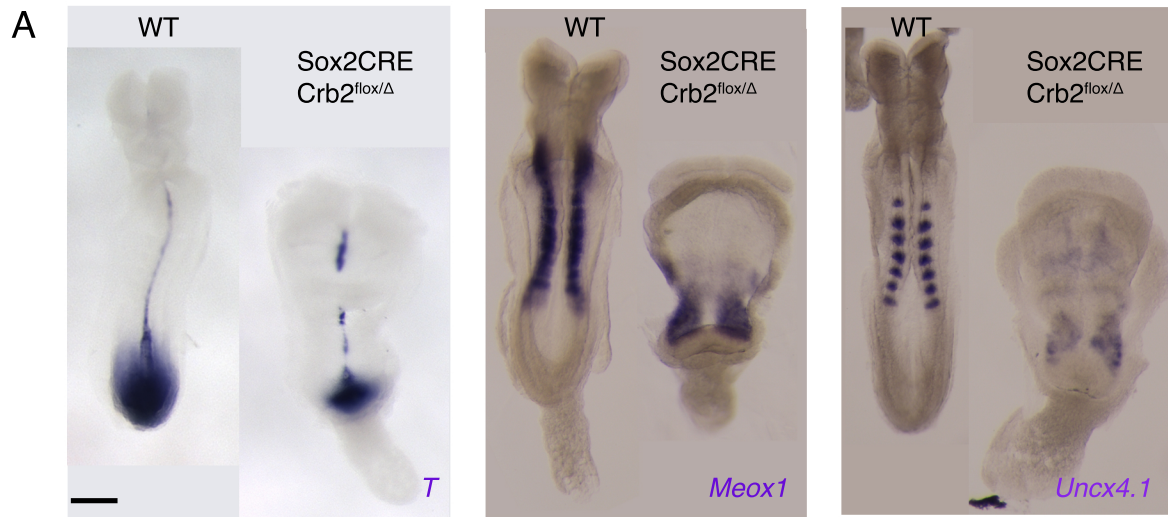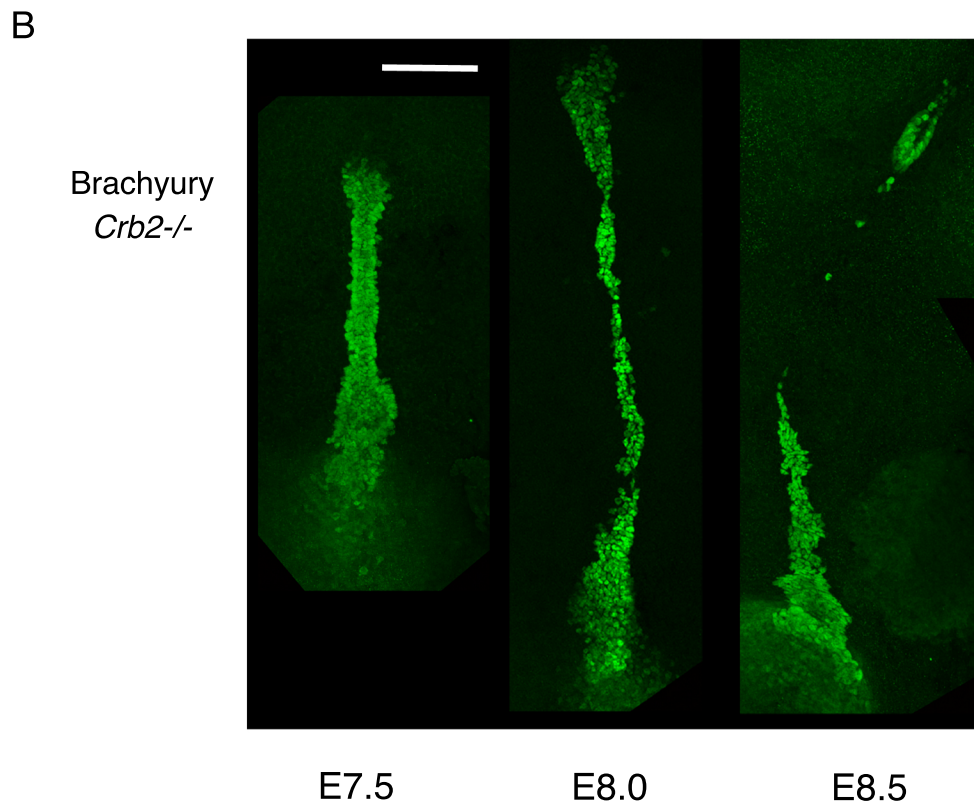

Supplement: NIHMS842486-supplement-S3.pdf [file NIHMS842486-supplement-S3.pdf]

A

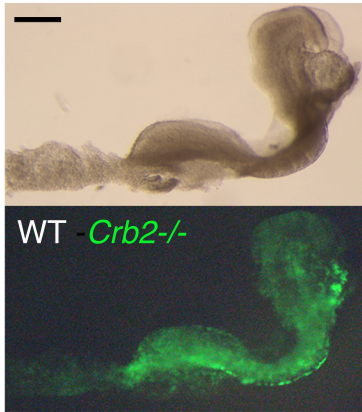

B

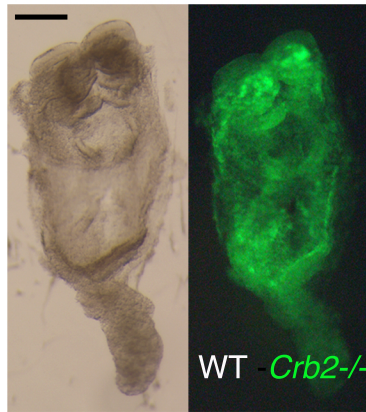

C

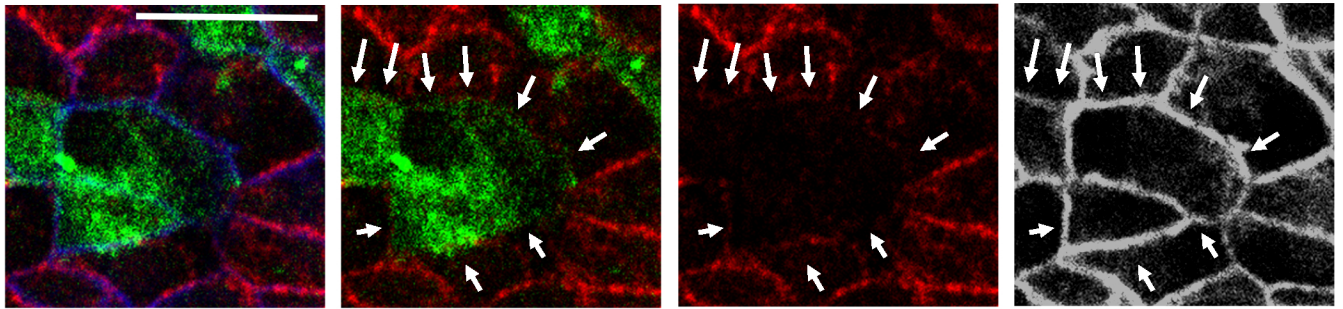

CRB2 *Crb2*<sup>-/-</sup> cells  $\beta$ -CATENIN

Supplement: NIHMS842486-supplement-S4.pdf [file NIHMS842486-supplement-S4.pdf]

A

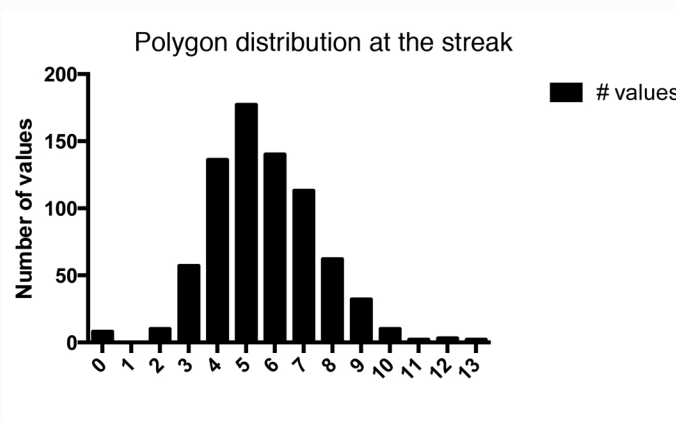

B

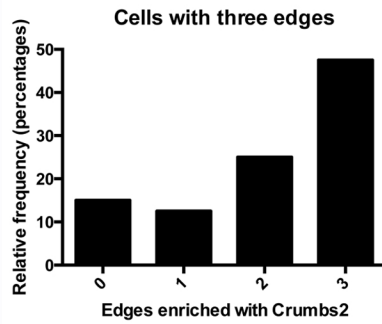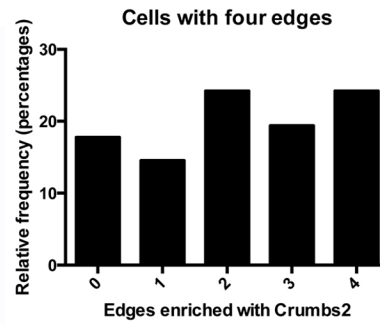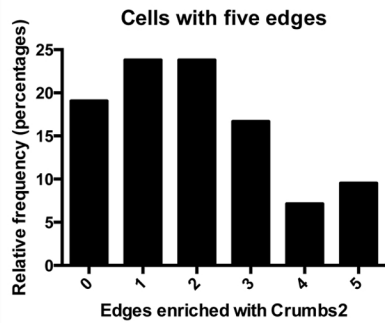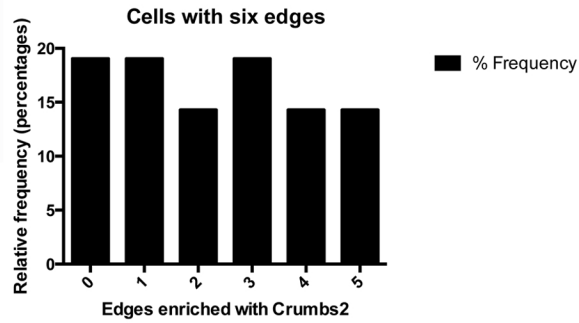

Supplement: NIHMS842486-supplement-S5.pdf [file NIHMS842486-supplement-S5.pdf]

A

WT

*Crb2*<sup>-/-</sup>

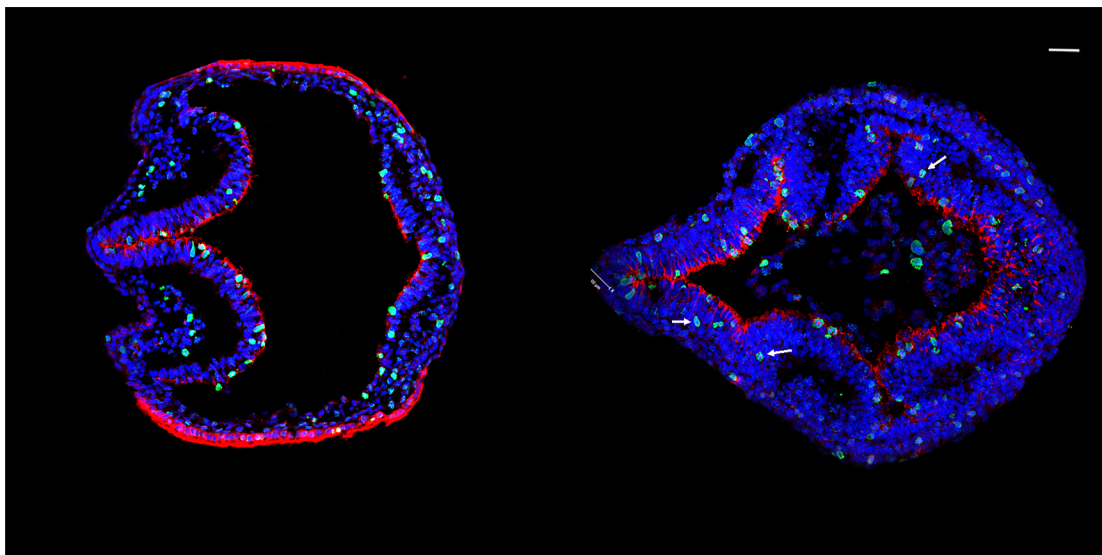

pHH3 acetylated tubulin DAPI

B

aPKC

Par3

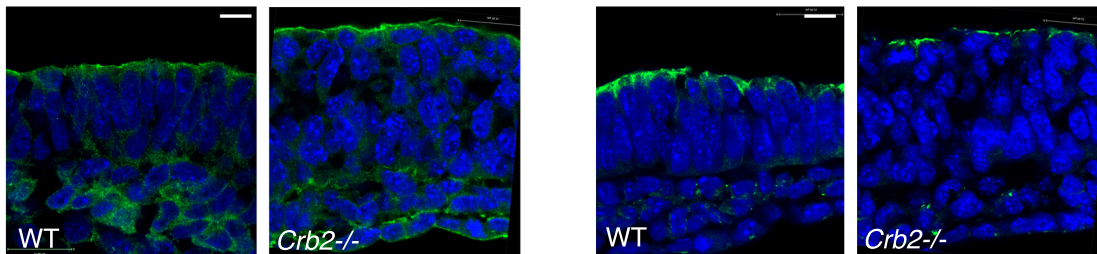

Supplement: NIHMS842486-supplement-S7.pdf [file NIHMS842486-supplement-S7.pdf]
